# Supplementary material for: Phylogenetic Analysis Reveals Four New Species of Otidea from China
Source: MDPI journal article supplement (doi:10.3390/biology11060866), 2022-06-06
Supplement: s1 [file s1]

Table S1. Information on sequences used in molecular phylogenetic analyses for *Otidea*.

Note: “—” shows no sequence in the GenBank database. GenBank accession numbers for sequences generated in this study are in boldface.

| Species name               | Specimen voucher     | Locality     | ITS             | LSU             | <i>efl-a</i>    | <i>rpb2</i>     |
|----------------------------|----------------------|--------------|-----------------|-----------------|-----------------|-----------------|
| <i>Monascella botryosa</i> | CBS 233.85           | Spain        | MH861870        | MH873558        | KC109256        | JX943831        |
| <i>O. adorniae</i>         | MCVE 30102           | Italy        | MK850486        | MK850502        | —               | —               |
| <i>O. adorniae</i>         | MCVE 30106           | Italy        | MK850484        | MK850500        | —               | —               |
| <i>O. adorniae</i>         | MCVE 30105           | Italy        | MK850483        | MK850499        | —               | —               |
| <i>O. alutacea</i>         | S-F257085            | Italy        | KM010069        | KM823192        | KM823260        | KM823386        |
| <i>O. alutacea</i>         | FLAS-F59409          | Pakistan     | MN495935        | MN493146        | —               | —               |
| <i>O. alutacea</i>         | KH.09.133            | Norway       | KM010071        | KM823185        | KM823253        | KM823381        |
| <i>O. alutacea</i>         | ARAN A3023204        | Spain        | KM010072        | KM823186        | KM823254        | KM823382        |
| <i>O. alutacea</i>         | S-F257084            | Italy        | KM010075        | KM823464        | —               | —               |
| <i>O. alutacea</i>         | OSC 56777            | USA          | AF072071        | AF086582        | —               | —               |
| <i>O. alutacea</i>         | OSC 56798            | USA          | AF072072        | AF086583        | —               | —               |
| <i>O. alutacea</i>         | OSC 56747            | USA          | AF072070        | KM823189        | KM823257        | —               |
| <i>O. alutacea</i>         | OSC 56770            | USA          | AF072073        | AF086585        | —               | —               |
| <i>O. alutacea</i>         | KH.09.135            | Norway       | KM010064        | KM823190        | KM823258        | KM823384        |
| <i>O. alutacea</i>         | KH.10.198            | Sweden       | KM010065        | KM823459        | —               | —               |
| <i>O. alutacea</i>         | KH.13.50             | Sweden       | KM010076        | KM823465        | —               | —               |
| <i>O. alutacea</i>         | JS.08.43             | Sweden       | KM010063        | KM823458        | —               | —               |
| <i>O. alutacea</i>         | KH.09.178            | Sweden       | KM010066        | KM823191        | KM823259        | KM823385        |
| <i>O. alutacea</i>         | K(M)142010           | England      | KT818924        | —               | —               | —               |
| <i>O. alutacea</i>         | KS-94-192            | Denmark      | KM010067        | KM823460        | —               | —               |
| <i>O. alutacea</i>         | Moorefun19           | USA          | KM010070        | KM823194        | KM823262        | KM823387        |
| <i>O. alutacea</i>         | OSC 56782            | USA          | AF072076        | AF086586        | —               | —               |
| <i>O. alutacea</i>         | OSC 56813            | USA          | AF072075        | AF086584        | —               | —               |
| <i>O. alutacea</i>         | OSC 56758            | USA          | AF072074        | KM823193        | KM823261        | —               |
| <i>O. alutacea</i>         | KH.07.46             | Denmark      | KM010061        | KM823457        | —               | —               |
| <i>O. alutacea</i>         | C-F-48045            | Sweden       | KM010068        | KM823461        | —               | —               |
| <i>O. alutacea</i>         | WZ 2123 (HMAS 72058) | China        | KU987013        | KU987025        | —               | —               |
| <i>O. alutacea</i>         | WZ 2128 (HMAS 72057) | China        | KU987014        | KU987026        | —               | OM792167        |
| <i>O. alutacea</i>         | HMAS 52742           | China        | <b>ON520743</b> | DQ443438        | —               | <b>ON550460</b> |
| <i>O. alutacea</i>         | HMAS 57844           | China        | <b>ON520778</b> | DQ443439        | <b>ON550447</b> | <b>ON550461</b> |
| <i>O. apophysata</i>       | S-F257062            | Germany      | KM010077        | KM823196        | KM823264        | KM823389        |
| <i>O. aspera</i>           | HMJAU 4166           | China        | OM743958        | OM743964        | OM792154        | OM792174        |
| <i>O. aspera</i>           | HSA 278              | China        | OM743960        | OM743951        | OM792153        | OM792175        |
| <b><i>O. aspera</i></b>    | <b>HSA 251</b>       | <b>China</b> | —               | <b>ON520898</b> | <b>ON550448</b> | <b>ON567204</b> |
| <b><i>O. bomiensis</i></b> | <b>HMAS 52743</b>    | <b>China</b> | <b>ON544012</b> | <b>ON552240</b> | <b>ON550449</b> | <b>ON550462</b> |
| <b><i>O. bomiensis</i></b> | <b>HMAS 75178</b>    | <b>China</b> | <b>ON550579</b> | <b>ON552242</b> | <b>ON550450</b> | <b>ON550463</b> |
| <i>O. borealis</i>         | S-F242694            | Finland      | KM010023        | KM823197        | KM823265        | KM823390        |
| <i>O. brevispora</i>       | HMAS 83551           | China        | OM792189        | OM722134        | OM792148        | OM792168        |
| <i>O. brunneoparva</i>     | KH.08.107            | Sweden       | KM010026        | KM823200        | KM823268        | KM823393        |
| <i>O. brunneoparva</i>     | S-F257086            | Finland      | KM010025        | KM823199        | KM823267        | KM823392        |
| <i>O. bufonia</i>          | KH.07.37             | Denmark      | JN942767        | JN941098        | KC109262        | JN993552        |
| <i>O. bufonia</i>          | KH.09.172            | Sweden       | JN942764        | JN941097        | KM823272        | KM823397        |
| <i>O. bufonia</i>          | KH.09.248            | Spain        | JN942766        | JN941084        | KM823269        | KM823394        |
| <i>O. bufonia</i>          | KH.09.249            | France       | KM010079        | KM823201        | KM823271        | KM823396        |

|                                 |                     |              |                 |                 |                 |                 |
|---------------------------------|---------------------|--------------|-----------------|-----------------|-----------------|-----------------|
| <i>O. caeruleopruinosa</i>      | H6010805            | Finland      | KF717575        | KM823202        | KM823273        | KM823398        |
| <i>O. caeruleopruinosa</i>      | MT 10082601         | Spain        | KM010030        | KM823203        | —               | KM823399        |
| <i>O. cantharella</i>           | KH.09.125           | Sweden       | KM010084        | KM823205        | KM823274        | KM823401        |
| <i>O. cantharella</i>           | NV 2008.09.16       | France       | KM010085        | KM823204        | —               | KM823400        |
| <i>O. concinna</i>              | KH.09.250           | Spain        | JN942775        | JN941095        | KM823276        | KM823403        |
| <i>O. concinna</i>              | KH.09.183           | Sweden       | KM010032        | JN941089        | KM823275        | KM823402        |
| <i>O. cupulata</i>              | HSA 406             | China        | OM743959        | OM743970        | OM792165        | OM792177        |
| <i>O. cupulata</i>              | HSA 218             | China        | OM743973        | OM743954        | OM792166        | OM792176        |
| <i>O. daliensis</i>             | SEST-06081702       | Spain        | KM010086        | KM823206        | KM823277        | KM823404        |
| <i>O. filiformis</i>            | HMAS 188468         | China        | OM743949        | OM743955        | OM792155        | OM792178        |
| <i>O. filiformis</i>            | BJTC C505           | China        | MW554241        | OM743968        | OM792156        | OM792179        |
| <i>O. filiformis</i>            | BJTC L482           | China        | MW554466        | OM743963        | OM792157        | OM792180        |
| <i>O. flavidobrunneola</i>      | H6010806            | Finland      | KF717576        | KM823209        | KM823279        | KM823407        |
| <i>O. flavidobrunneola</i>      | KH.09.153           | Norway       | KM010088        | KM823207        | —               | KM823405        |
| <i>O. formicarum</i>            | JS.08.63            | Sweden       | KM010035        | KM823212        | KM823282        | —               |
| <i>O. formicarum</i>            | H6003549            | Finland      | KF717577        | KM823211        | KM823281        | KM823409        |
| <i>O. formicarum</i>            | S-F244372           | Norway       | KM010034        | KM823210        | KM823280        | KM823408        |
| <b><i>O. gongnaisiensis</i></b> | <b>HMAS 69951</b>   | <b>China</b> | <b>ON550580</b> | <b>ON552243</b> | <b>ON550451</b> | <b>ON550464</b> |
| <b><i>O. gongnaisiensis</i></b> | <b>HMAS 83574</b>   | <b>China</b> | <b>ON551357</b> | <b>ON552244</b> | <b>ON550452</b> | <b>ON550465</b> |
| <i>O. hanseniae</i>             | WZ 2202             | China        | KU987012        | KU987024        | KU987033        | —               |
| <i>O. hanseniae</i>             | XF007               | China        | KU987016        | KU987028        | KU987035        | KU987038        |
| <b><i>O. hanzhongensis</i></b>  | <b>610723MF0034</b> | <b>China</b> | <b>KY950470</b> | <b>ON552257</b> | <b>ON550453</b> | <b>ON550466</b> |
| <i>O. kaushalii</i>             | T. Læssøe 6236      | Malaysia     | KM010119        | AF335111        | KM823326        | KM823455        |
| <i>O. khakicolorata</i>         | BJTC FM107          | China        | OM743967        | OM743950        | OM792158        | OM792181        |
| <i>O. korfii</i>                | Z.W. Ge 1913        | China        | KU987017        | KU987029        | KU987036        | —               |
| <i>O. kunmingensis</i>          | HKAS 49452          | China        | MK850489        | —               | —               | —               |
| <i>O. lactea</i>                | HMAS 61359          | China        | OM721661        | DQ443447        | —               | —               |
| <i>O. leporina</i>              | NV 2008.09.28       | France       | KM010092        | KM823214        | KM823284        | KM823411        |
| <i>O. leporina</i>              | OSC 56784           | USA          | —               | KM823215        | KM823285        | KM823412        |
| <i>O. leporina</i>              | H6003548            | Finland      | KF717578        | KM823222        | KM823292        | KM823421        |
| <i>O. leporina</i>              | KH.09.93            | Sweden       | KM010090        | KM823213        | KM823283        | KM823410        |
| <i>O. minor</i>                 | KH.98.84            | Denmark      | KM010041        | KM823217        | KM823287        | KM823414        |
| <i>O. minor</i>                 | H6008618            | Finland      | KM010039        | KM823219        | KM823289        | KM823416        |
| <i>O. minor</i>                 | KH.10.311           | Sweden       | KM010042        | KM823218        | KM823288        | KM823415        |
| <i>O. mirabilis</i>             | KH.01.09            | Denmark      | JN942769        | AY500540        | KM823290        | KM823419        |
| <i>O. mirabilis</i>             | NV 2008.09.14       | France       | JN942768        | JN941094        | KM823291        | KM823420        |
| <i>O. mirabilis</i>             | KH.10.285           | Sweden       | KM010094        | KM823221        | —               | KM823418        |
| <i>O. nannfeldtii</i>           | JS.08.103           | Sweden       | KM010045        | KM823224        | KM823294        | KM823423        |
| <i>O. nannfeldtii</i>           | H6002902            | Finland      | KF717581        | KM823228        | KM823297        | KM823426        |
| <i>O. nannfeldtii</i>           | NV 2008.10.01       | France       | KM010099        | KM823227        | KM823296        | KM823425        |
| <i>O. nannfeldtii</i>           | rh101310            | USA          | KM010100        | KM823226        | KM823295        | KM823424        |
| <i>O. onotica</i>               | OSC 56759           | USA          | AF072068        | JN941088        | KM823300        | KM823430        |
| <i>O. onotica</i>               | C-F-89691           | Denmark      | JN942773        | JN941090        | —               | KM823427        |
| <i>O. onotica</i>               | KH.10.284           | Sweden       | KP006505        | KM823229        | KM823299        | KM823429        |
| <i>O. onotica</i>               | KH.09.132           | Norway       | KM010103        | KC012692        | KC109263        | JX943828        |
| <i>O. oregonensis</i>           | OSC 56745           | USA          | AF072089        | KM823232        | KM823303        | KM823433        |
| <i>O. oregonensis</i>           | Moorefun 58         | USA          | KM010048        | KM823231        | KM823302        | KM823432        |
| <i>O. oregonensis</i>           | Moorefun 31         | USA          | KM010047        | KM823230        | KM823301        | KM823431        |
| <i>O. papillata</i>             | TUR 102134          | Finland      | KM010105        | KM823233        | KM823304        | KM823434        |

|                                                       |                         |              |                 |                 |                 |                 |
|-------------------------------------------------------|-------------------------|--------------|-----------------|-----------------|-----------------|-----------------|
| <i>O. papillata</i>                                   | H6003547                | Finland      | KF717582        | KM823234        | KM823305        | KM823435        |
| <i>O. parvispora</i>                                  | JS.08.81                | Sweden       | KM010062        | KM823187        | KM823255        | KM823383        |
| <i>O. parvispora</i>                                  | MCVE 30108              | Spain        | MK850491        | MK850504        | —               | —               |
| <i>O. parvispora</i>                                  | MCVE 30107              | Greece       | MK850490        | MK850503        | —               | —               |
| <i>O. parvula</i>                                     | BJTC FM210-A            | China        | OM743965        | OM743966        | OM792159        | OM792182        |
| <i>O. parvula</i>                                     | BJTC FM210-B            | China        | OM743962        | OM743956        | OM792160        | OM792183        |
| <i>O. phlebophora</i>                                 | JV06-385                | Denmark      | KM010049        | KM823236        | KM823306        | KM823436        |
| <i>O. phlebophora</i>                                 | S-F108338               | Sweden       | KM010050        | KM823490        | —               | —               |
| <i>O. platyspora</i>                                  | KH.09.163               | Sweden       | KM010106        | KM823238        | KM823308        | KM823438        |
| <i>O. platyspora</i>                                  | JV06-656                | Denmark      | KM010108        | KM823237        | KM823307        | KM823437        |
| <i>O. plicara</i>                                     | BJTC FM262-A            | China        | OM743957        | OM743971        | OM792161        | OM792187        |
| <i>O. plicara</i>                                     | BJTC FM262-B            | China        | OM743961        | OM743952        | OM792162        | OM792186        |
| <i>O. propinquata</i>                                 | NV 2008.09.15           | France       | KM010111        | KM823240        | KM823310        | KM823440        |
| <i>O. propinquata</i>                                 | KH.09.99                | Sweden       | KM010109        | KM823239        | KM823309        | KM823439        |
| <i>O. pseudoformicarum</i>                            | HKAS 101386             | China        | KY498601        | KY498606        | —               | MG980709        |
| <i>O. pseudoleporina</i>                              | Moorefun14              | USA          | KM010113        | KM823242        | KM823312        | KM823442        |
| <i>O. pseudoleporina</i>                              | rh101910                | USA          | KM010112        | KM823243        | KM823313        | KM823443        |
| <i>O. purpureobrunnea</i>                             | BJTC FM1061             | China        | OM743969        | OM743972        | OM792163        | OM792185        |
| <i>O. purpureobrunnea</i>                             | BJTC FM1048             | China        | OM743974        | OM743953        | OM792164        | OM792184        |
| <i>O. purpureogrisea</i>                              | Z.W. Ge 863 (HKAS       | China        | KU987011        | KU987023        | KU987032        | KU987037        |
| <i>O. purpureogrisea</i>                              | WZ 2157 (HMAS72805)     | China        | KU987015        | KU987027        | KU987034        | OM792170        |
| <i>O. purpureogrisea</i> as <i>O. olivaceobrunnea</i> | HMAS 23948              | China        | KU987010        | KU987022        | —               | —               |
| <i>O. rainierensis</i>                                | A.H. Smith 30553 (MICH) | USA          | KF717583        | KM823245        | KM823315        | KM823445        |
| <i>O. saliceticola</i>                                | MCVE 29365              | Italy        | MG383806        | MG383814        | —               | —               |
| <b><i>O. shennongjina</i></b>                         | <b>HMAS 53691</b>       | <b>China</b> | <b>ON551356</b> | <b>ON552249</b> | <b>ON550454</b> | <b>ON550467</b> |
| <b><i>O. shennongjina</i></b>                         | <b>HMAS 53692</b>       | <b>China</b> | <b>ON551386</b> | <b>ON552248</b> | <b>ON550455</b> | <b>ON550468</b> |
| <i>O. sinensis</i>                                    | HMAS 61360              | China        | OM722037        | DQ443451        | —               | —               |
| <b><i>O. sinensis</i></b>                             | <b>HMAS 268390</b>      | <b>China</b> | <b>ON520792</b> | <b>ON521126</b> | <b>ON550456</b> | <b>ON550469</b> |
| <b><i>O. sinensis</i></b>                             | <b>HMAS 268544</b>      | <b>China</b> | <b>ON520802</b> | <b>ON521143</b> | <b>ON550457</b> | <b>ON550470</b> |
| <i>O. smithii</i>                                     | OSC 56799               | USA          | AF072063        | JN941087        | KM823317        | KM823447        |
| <i>O. smithii</i>                                     | ecv3345                 | USA          | JN942771        | JN941093        | KM823316        | KM823446        |
| <i>O. stipitata</i>                                   | HKAS 87865              | China        | KY498603        | KY498608        | —               | —               |
| <i>O. subformicarum</i>                               | CMP 1179                | Spain        | KM010053        | KM823246        | KM823318        | KM823448        |
| <i>O. subformicarum</i>                               | CL050928-30             | Italy        | KM010052        | KM823247        | KM823319        | KM823449        |
| <i>O. subformicarum</i>                               | S-F242696               | Spain        | KM010054        | KM823495        | —               | —               |
| <i>O. aff. subformicarum</i>                          | FH301035                | Mexico       | KM010055        | KM823249        | KM823321        | KM823451        |
| <i>O. aff. subformicarum</i>                          | FH301036                | Mexico       | KM010056        | KM823248        | KM823320        | KM823450        |
| <i>O. subpurpurea</i>                                 | HKAS 54449              | China        | KU987018        | KU987030        | OM792150        | OM792171        |
| <i>O. subpurpurea</i>                                 | HMAS 97530              | China        | KU987019        | KU987031        | —               | —               |
| <i>O. subpurpurea</i> as <i>O. bicolor</i>            | HKAS 54453              | China        | OM714812        | OM722133        | OM792152        | OM792173        |
| <i>O. subpurpurea</i> as <i>O. pruinosa</i>           | HKAS 81819              | China        | KY498602        | KY498607        | OM792149        | OM792169        |
| <i>O. subterranea</i>                                 | RH69                    | USA          | FJ404767        | FJ404767        | —               | —               |
| <i>O. subterranea</i>                                 | RH97                    | USA          | FJ404766        | FJ404766        | —               | —               |
| <i>O. tuomikoskii</i>                                 | NV 2008.09.08           | France       | JN942777        | JN941091        | KM823323        | KM823453        |
| <i>O. tuomikoskii</i>                                 | KH.09.130               | Norway       | JN942776        | JN941092        | KM823322        | KM823452        |
| <i>O. tuomikoskii</i>                                 | OSC 56761               | USA          | AF072085        | KM823251        | KM823325        | KM823454        |

|                            |                   |              |                 |                 |                 |                 |
|----------------------------|-------------------|--------------|-----------------|-----------------|-----------------|-----------------|
| <i>O. tuomikoskii</i>      | H6002901          | Finland      | KF717585        | KM823250        | KM823324        | —               |
| <i>O. unicisa</i>          | ZW Geo65-Clark    | USA          | KM010118        | AY789369        | —               | —               |
| <i>O. unicisa</i>          | KH.06.06          | USA          | —               | KC012693        | KC109264        | JX943829        |
| <i>O. yunnanensis</i>      | HMAS 82166        | China        | —               | DQ443452        | —               | —               |
| <i>O. sp.</i>              | GMFN 2293         | Italy        | KM010037        | KM823476        | —               | —               |
| <i>O. sp.</i>              | MK1081            | Sweden       | KM010058        | KM823501        | —               | —               |
| <i>O. sp.</i>              | MK0942            | Sweden       | KM010057        | KM823500        | —               | —               |
| <i>O. sp.</i>              | KH.09.79          | Sweden       | KM010120        | KM823252        | KM823327        | KM823456        |
| <b><i>O. sp. 'c'</i></b>   | <b>HMAS 85660</b> | <b>China</b> | <b>ON520805</b> | <b>ON521145</b> | <b>ON550458</b> | <b>ON567203</b> |
| <b><i>O. sp</i></b>        | <b>HMAS 88262</b> | <b>China</b> | <b>ON520806</b> | <b>ON521147</b> | <b>ON550459</b> | <b>ON550471</b> |
| <i>Warcupia terrestris</i> | CBS 891.69        | Canada       | MH859473        | MH871254        | KC109308        | JX943832        |
